# Supplementary material for: Effects of Tumor Localization, Age, and Stage on the Outcomes of Gastric and Colorectal Signet Ring Cell Adenocarcinomas
Source: MDPI journal article supplement (doi:10.3390/cancers15030714), 2023-01-24
Supplement: s1 [file s1]

Supplementary Material

# Effects of Tumor Localization, Age, and Stage on the Outcomes of Gastric and Colorectal Signet Ring Cell Adenocarcinomas

**Table S1.** Definitions of organ localization by ICD-O-3 codes within this study.

| Gastric*                                                                    | Colorectal**                                                                                                           |
|-----------------------------------------------------------------------------|------------------------------------------------------------------------------------------------------------------------|
| <b>Proximal Stomach</b><br>Cardia – C16.0<br>Fundus – C16.1<br>Body – C16.2 | <b>Right Colon</b><br>Cecum – C18.0<br>Appendix – C18.1<br>Ascending Colon – C18.2<br>Hepatic Flexure of Colon – C18.3 |
| <b>Distal Stomach</b><br>Antrum – C16.3<br>Pylorus – C16.4                  | <b>Transverse Colon – C18.4</b>                                                                                        |
|                                                                             | <b>Left Colon</b><br>Splenic Flexure of Colon – C18.5<br>Descending Colon – C18.6<br>Sigmoid Colon – C18.7             |
|                                                                             | <b>Rectal</b><br>Rectosigmoid junction – C19.9<br>Rectum – C20.9                                                       |

\*Excluded gastric codes are C16.5 (lesser curvature of stomach, NOS (not otherwise specified) not classifiable to C16.1-C16.4), C16.6 (greater curvature of stomach, NOS, not classifiable to C16.0-C16.4), C16.8 (overlapping lesion of stomach), and C16.9 (stomach, NOS).

\*\*Excluded colorectal codes are C18.8 (overlapping lesion of colon), C19.9 (colon, NOS).

**Table S2.** Derived univariate and multivariable Cox-proportional hazard ratios of mortality for gastric adenocarcinomas.

| Gastric Location   | Adenocarcinoma<br>(All Ages) |                  | Adenocarcinoma<br>(Age <50) |                  | Adenocarcinoma<br>(Age ≥50) |                  |
|--------------------|------------------------------|------------------|-----------------------------|------------------|-----------------------------|------------------|
|                    | Univariate                   | Multivariable    | Univariate                  | Multivariable    | Univariate                  | Multivariable    |
| <b>HR (95% CI)</b> |                              |                  |                             |                  |                             |                  |
| <b>Proximal</b>    | 1.00 (Reference)             | 1.00 (Reference) | 1.00 (Reference)            | 1.00 (Reference) | 1.00 (Reference)            | 1.00 (Reference) |
| <b>Distal</b>      | 0.79 (0.77-0.81)             | 0.93 (0.90-0.95) | 0.82 (0.75-0.90)            | 1.01 (0.92-1.11) | 0.79 (0.77-0.81)            | 0.91 (0.88-0.94) |
| <b>Cardia</b>      | 1.00 (Reference)             | 1.00 (Reference) | 1.00 (Reference)            | 1.00 (Reference) | 1.00 (Reference)            | 1.00 (Reference) |
| <b>Fundus</b>      | 1.20 (1.14-1.27)             | 1.10 (1.04-1.15) | 1.11 (0.94-1.32)            | 1.02 (0.86-1.21) | 1.21 (1.15-1.28)            | 1.10 (1.03-1.16) |
| <b>Body</b>        | 0.95 (0.92-0.99)             | 0.96 (0.92-1.00) | 1.04 (0.91-1.18)            | 1.03 (0.90-1.19) | 0.95 (0.91-0.99)            | 0.94 (0.90-0.99) |
| <b>Antrum</b>      | 0.79 (0.77-0.81)             | 0.91 (0.88-0.94) | 0.85 (0.77-0.94)            | 0.99 (0.89-1.11) | 0.79 (0.76-0.81)            | 0.89 (0.86-0.92) |
| <b>Pylorus</b>     | 0.82 (0.77-0.88)             | 0.91 (0.85-0.97) | 0.73 (0.59-0.90)            | 0.93 (0.74-1.17) | 0.83 (0.78-0.89)            | 0.90 (0.84-0.96) |

$p < 0.05$  for all results unless confidence interval crosses 1. Multivariable adjustment corrected for gender, race, detection stage, grade differentiation, surgery, radiotherapy, and chemotherapy. HR, hazard ratios.

**Table S3.** Derived univariate and multivariable Cox-proportional hazard ratios of mortality for gastric SRCCs.

| Gastric Location   | Signet Ring Cell<br>(All Ages) |                  | Signet Ring Cell<br>(Age <50) |                  | Signet Ring Cell<br>(Age ≥50) |                  |
|--------------------|--------------------------------|------------------|-------------------------------|------------------|-------------------------------|------------------|
|                    | Univariate                     | Multivariable    | Univariate                    | Multivariable    | Univariate                    | Multivariable    |
| <b>HR (95% CI)</b> |                                |                  |                               |                  |                               |                  |
| <b>Proximal</b>    | 1.00 (Reference)               | 1.00 (Reference) | 1.00 (Reference)              | 1.00 (Reference) | 1.00 (Reference)              | 1.00 (Reference) |
| <b>Distal</b>      | 0.75 (0.71-0.79)               | 0.91 (0.86-0.96) | 0.72 (0.65-0.80)              | 0.90 (0.80-1.01) | 0.76 (0.72-0.81)              | 0.91 (0.86-0.96) |
| <b>Cardia</b>      | 1.00 (Reference)               | 1.00 (Reference) | 1.00 (Reference)              | 1.00 (Reference) | 1.00 (Reference)              | 1.00 (Reference) |
| <b>Fundus</b>      | 0.97 (0.87-1.08)               | 0.96 (0.86-1.09) | 1.18 (0.94-1.49)              | 1.31 (1.01-1.69) | 0.92 (0.81-1.04)              | 0.90 (0.79-1.03) |
| <b>Body</b>        | 0.85 (0.79-0.91)               | 0.86 (0.80-0.93) | 0.93 (0.80-1.09)              | 0.93 (0.78-1.10) | 0.84 (0.77-0.90)              | 0.93 (0.79-1.10) |
| <b>Antrum</b>      | 0.71 (0.67-0.76)               | 0.86 (0.80-0.93) | 0.72 (0.62-0.82)              | 0.93 (0.80-1.07) | 0.72 (0.68-0.77)              | 0.85 (0.79-0.91) |
| <b>Pylorus</b>     | 0.61 (0.54-0.69)               | 0.77 (0.67-0.87) | 0.68 (0.53-0.86)              | 0.94 (0.72-1.23) | 0.60 (0.52-0.69)              | 0.73 (0.63-0.85) |

$p < 0.05$  for all results unless confidence interval crosses 1. Multivariable adjustment corrected for gender, race, detection stage, grade differentiation, surgery, radiotherapy, and chemotherapy. HR, hazard ratios.

**Table S4.** Cause-specific survival of gastric conventional adenocarcinomas and SRCCs by age group and site.

| Gastric Location                   | All Patients     |                  | Age < 50 years   |                  | Age ≥ 50 years   |                  |
|------------------------------------|------------------|------------------|------------------|------------------|------------------|------------------|
| Cause-Specific Survival % (95% CI) | Adenocarcinoma   | Signet Ring Cell | Adenocarcinoma   | Signet Ring Cell | Adenocarcinoma   | Signet Ring Cell |
| <b>All Sites</b>                   |                  |                  |                  |                  |                  |                  |
| <b>Localized</b>                   |                  |                  |                  |                  |                  |                  |
| 1-year                             | 76.8 (75.7-77.8) | 73.8 (71.6-75.9) | 87.8 (83.9-90.8) | 86.5 (81.5-90.2) | 76.1 (75.0-77.2) | 71.5 (69.0-73.8) |
| 2-year                             | 66.2 (65.0-67.3) | 62.6 (60.2-65.0) | 82.0 (77.6-85.7) | 77.4 (71.6-82.1) | 65.2 (64.0-66.4) | 59.9 (57.2-62.5) |
| 5-year                             | 54.3 (53.0-55.5) | 51.0 (48.4-53.6) | 71.4 (66.3-75.8) | 66.9 (60.5-72.5) | 53.2 (51.9-54.5) | 48.1 (45.2-50.8) |
| 10-year                            | 48.8 (47.4-50.2) | 46.1 (43.4-48.8) | 67.5 (62.1-72.4) | 60.9 (53.9-67.2) | 47.6 (46.2-49.0) | 43.4 (40.4-46.3) |
| Median (months)                    | 96.8             | 69.2             | -                | -                | 85.1             | 51.7             |
| <b>Regional</b>                    |                  |                  |                  |                  |                  |                  |
| 1-year                             | 66.6 (65.5-67.7) | 66.0 (64.1-67.9) | 75.6 (72.2-78.6) | 79.5 (75.6-82.8) | 65.7 (64.5-66.8) | 62.7 (60.6-64.8) |
| 2-year                             | 46.2 (45.0-47.3) | 44.9 (42.9-46.8) | 54.4 (50.6-58.0) | 58.1 (53.5-62.4) | 45.3 (44.1-46.5) | 41.6 (39.4-43.8) |
| 5-year                             | 28.6 (27.5-29.7) | 25.4 (23.6-27.2) | 36.5 (32.8-40.1) | 33.3 (29.0-37.6) | 27.7 (26.6-28.9) | 23.4 (21.5-25.4) |
| 10-year                            | 22.6 (21.5-23.7) | 19.3 (17.6-21.1) | 29.3 (25.6-33.0) | 24.9 (20.8-29.2) | 21.9 (20.7-23.0) | 18.0 (16.1-19.9) |
| Median (months)                    | 20.9             | 20.1             | 27.7             | 31.5             | 20.3             | 17.9             |
| <b>Distant</b>                     |                  |                  |                  |                  |                  |                  |
| 1-year                             | 29.6 (28.7-30.5) | 25.7 (24.1-27.3) | 34.6 (31.9-37.3) | 28.5 (25.2-31.8) | 28.9 (28.0-29.9) | 24.8 (23.0-26.6) |
| 2-year                             | 13.2 (12.6-13.9) | 10.0 (9.0-11.2)  | 16.2 (14.4-18.3) | 10.5 (8.4-13.0)  | 12.8 (12.1-13.6) | 9.9 (8.7-11.2)   |
| 5-year                             | 5.0 (4.6-5.5)    | 2.9 (2.3-3.6)    | 5.2 (4.0-6.6)    | 2.8 (1.7-4.3)    | 5.0 (4.6-5.5)    | 3.0 (2.3-3.8)    |
| 10-year                            | 3.8 (3.4-4.3)    | 2.3 (1.7-2.9)    | 3.0 (2.8-5.2)    | 2.6 (1.6-4.1)    | 3.8 (3.4-4.3)    | 2.2 (1.6-3.0)    |
| Median (months)                    | 6.0              | 5.9              | 8.4              | 7.0              | 5.7              | 5.5              |
| <b>Proximal</b>                    |                  |                  |                  |                  |                  |                  |
| <b>Localized</b>                   |                  |                  |                  |                  |                  |                  |
| 1-year                             | 76.1 (74.9-77.3) | 70.0 (66.8-73.1) | 87.1 (82.4-90.6) | 83.9 (75.7-89.6) | 75.5 (74.2-76.7) | 67.8 (64.2-71.1) |
| 2-year                             | 64.0 (62.6-65.4) | 56.3 (52.8-59.7) | 80.2 (74.8-84.5) | 71.3 (61.9-78.8) | 63.0 (61.6-64.5) | 53.9 (50.1-57.5) |
| 5-year                             | 51.5 (50.0-53.0) | 43.1 (39.5-46.6) | 70.3 (64.3-75.5) | 57.7 (47.8-66.4) | 50.3 (48.7-51.9) | 40.7 (36.9-44.5) |
| 10-year                            | 45.7 (44.1-47.3) | 37.7 (34.1-41.4) | 66.3 (59.8-71.9) | 53.7 (43.5-62.9) | 44.3 (42.6-46.0) | 35.1 (31.2-39.0) |
| Median (months)                    | 69.9             | 35.4             | -                | -                | 61.0             | 31.6             |
| <b>Regional</b>                    |                  |                  |                  |                  |                  |                  |
| 1-year                             | 68.2 (66.9-69.5) | 62.9 (60.2-65.5) | 77.1 (73.2-80.5) | 77.3 (71.2-82.2) | 67.2 (65.8-68.6) | 59.8 (56.7-62.7) |
| 2-year                             | 46.9 (45.5-48.3) | 41.1 (38.3-43.8) | 54.8 (50.3-59.0) | 55.8 (49.0-62.1) | 46.0 (44.5-47.5) | 37.8 (34.8-40.8) |
| 5-year                             | 27.9 (26.6-29.2) | 21.6 (19.3-24.1) | 35.0 (30.8-39.3) | 28.9 (22.9-35.1) | 27.1 (25.7-28.5) | 20.0 (17.5-22.7) |
| 10-year                            | 21.6 (20.3-23.0) | 16.8 (14.6-19.3) | 27.2 (23.0-31.5) | 21.7 (16.1-27.9) | 21.0 (19.6-22.4) | 15.8 (13.4-18.5) |
| Median (months)                    | 21.7             | 17.6             | 27.4             | 29.4             | 21.0             | 16.2             |
| <b>Distant</b>                     |                  |                  |                  |                  |                  |                  |
| 1-year                             | 30.7 (29.7-31.7) | 25.1 (23.2-27.1) | 36.5 (33.4-39.5) | 27.7 (23.5-32.0) | 29.9 (28.8-31.0) | 24.4 (22.2-26.6) |
| 2-year                             | 13.6 (12.8-14.4) | 8.9 (7.7-10.3)   | 17.2 (14.8-19.7) | 8.7 (6.2-11.8)   | 13.1 (12.3-13.9) | 9.0 (7.5-10.6)   |
| 5-year                             | 5.0 (4.5-5.6)    | 2.5 (1.8-3.4)    | 5.5 (4.1-7.2)    | 2.2 (1.0-4.0)    | 5.0 (4.4-5.5)    | 2.6 (1.8-3.7)    |
| 10-year                            | 3.7 (3.2-4.2)    | 2.1 (1.4-2.9)    | 4.0 (2.8-5.6)    | 2.2 (1.0-4.0)    | 3.6 (3.1-4.2)    | 2.1 (1.4-3.1)    |
| Median (months)                    | 6.5              | 5.9              | 9.0              | 7.0              | 6.2              | 5.6              |
| <b>Distal</b>                      |                  |                  |                  |                  |                  |                  |
| <b>Localized</b>                   |                  |                  |                  |                  |                  |                  |
| 1-year                             | 78.3 (76.4-80.1) | 77.8 (74.7-80.6) | 89.9 (81.4-94.6) | 88.6 (81.9-93.0) | 77.7 (75.8-79.6) | 75.6 (72.0-78.7) |
| 2-year                             | 71.3 (69.2-73.3) | 69.3 (65.9-72.5) | 87.6 (78.7-92.9) | 82.5 (74.9-88.0) | 70.5 (68.3-72.6) | 66.6 (62.7-70.1) |
| 5-year                             | 60.9 (58.6-63.2) | 59.4 (55.8-62.9) | 74.5 (63.9-82.5) | 74.5 (66.0-81.2) | 60.3 (57.9-62.6) | 56.2 (52.1-60.1) |
| 10-year                            | 56.3 (53.8-58.7) | 54.9 (50.9-58.7) | 71.3 (60.2-79.9) | 67.0 (57.2-75.1) | 55.5 (52.9-58.0) | 52.4 (48.0-56.6) |
| Median (months)                    | -                | -                | -                | -                | -                | -                |
| <b>Regional</b>                    |                  |                  |                  |                  |                  |                  |
| 1-year                             | 63.0 (61.0-65.0) | 69.2 (66.6-71.7) | 71.5 (64.5-77.3) | 81.4 (76.1-85.6) | 62.2 (60.1-64.3) | 65.9 (62.8-68.8) |
| 2-year                             | 44.6 (42.5-46.7) | 48.8 (45.9-51.6) | 53.4 (46.1-60.2) | 60.0 (53.8-65.7) | 43.8 (41.6-45.9) | 45.7 (42.5-48.9) |
| 5-year                             | 30.1 (28.5-31.7) | 29.2 (26.6-31.9) | 40.2 (33.1-47.2) | 37.0 (31.0-42.9) | 29.1 (27.1-31.2) | 27.1 (24.2-30.0) |
| 10-year                            | 24.6 (22.7-26.6) | 22.0 (1.4-24.6)  | 34.5 (27.5-41.6) | 27.6 (21.9-33.6) | 23.6 (21.6-25.7) | 20.4 (17.6-23.4) |
| Median (months)                    | 19.3             | 23.1             | 28.4             | 34.4             | 18.9             | 20.3             |
| <b>Distant</b>                     |                  |                  |                  |                  |                  |                  |
| 1-year                             | 25.9 (24.2-27.7) | 26.7 (24.1-29.4) | 27.5 (22.1-33.2) | 29.7 (24.6-35.0) | 25.8 (23.9-27.7) | 25.5 (22.6-28.6) |
| 2-year                             | 12.1 (10.8-13.4) | 12.0 (10.1-14.0) | 12.3 (8.5-16.8)  | 13.1 (9.5-17.4)  | 12.0 (10.7-13.5) | 11.5 (9.4-13.9)  |
| 5-year                             | 5.1 (4.2-6.1)    | 3.6 (2.5-4.9)    | 4.0 (2.0-7.2)    | 3.6 (1.8-6.5)    | 5.3 (4.3-6.4)    | 3.5 (2.3-5.1)    |
| 10-year                            | 4.3 (3.4-5.3)    | 2.6 (1.7-3.8)    | 3.4 (1.5-6.5)    | 3.2 (1.5-6.0)    | 4.4 (3.5-5.5)    | 2.4 (1.4-3.8)    |
| Median (months)                    | 4.5              | 6.0              | 6.5              | 7.1              | 4.3              | 5.4              |

CI, confidence interval; Proximal includes cardia, fundus, and body; Distal includes antrum and pylorus

**Table S5.** Relative survival of gastric conventional adenocarcinomas and SRCCs by age group and site.

| Gastric Location                | All Patients     |                  | Age < 50 years   |                  | Age ≥50 years    |                  |
|---------------------------------|------------------|------------------|------------------|------------------|------------------|------------------|
| Relative Survival %<br>(95% CI) | Adenocarcinoma   | Signet Ring Cell | Adenocarcinoma   | Signet Ring Cell | Adenocarcinoma   | Signet Ring Cell |
| <b>All Sites</b>                |                  |                  |                  |                  |                  |                  |
| <b>Localized</b>                |                  |                  |                  |                  |                  |                  |
| 1-year                          | 74.0 (72.9-75.1) | 71.3 (69.0-73.5) | 86.9 (82.9-90.0) | 86.9 (82.0-90.6) | 73.3 (72.1-74.4) | 68.5 (65.9-71.0) |
| 2-year                          | 63.0 (61.8-64.3) | 60.2 (57.7-62.7) | 80.4 (75.8-84.2) | 77.3 (71.5-82.1) | 62.0 (60.7-63.3) | 57.1 (54.3-59.8) |
| 5-year                          | 50.4 (49.0-51.8) | 48.4 (45.7-51.1) | 68.2 (62.9-72.8) | 66.5 (60.1-72.2) | 49.4 (47.9-50.8) | 45.1 (42.1-48.1) |
| 10-year                         | 42.6 (40.8-44.3) | 42.5 (39.3-45.6) | 62.0 (56.1-67.3) | 60.1 (52.9-66.6) | 41.4 (39.5-43.2) | 39.2 (35.6-42.7) |
| Median (months)                 | 61.8             | 52.7             | -                | -                | 56.8             | 38.9             |
| <b>Regional</b>                 |                  |                  |                  |                  |                  |                  |
| 1-year                          | 65.3 (64.2-66.4) | 65.0 (63.1-66.9) | 74.7 (71.3-77.8) | 78.7 (74.8-82.0) | 64.3 (63.1-65.5) | 61.7 (59.5-63.8) |
| 2-year                          | 44.6 (43.4-45.8) | 43.7 (41.7-45.7) | 53.0 (49.3-56.6) | 56.7 (52.2-60.9) | 43.7 (42.4-44.9) | 40.5 (38.3-42.7) |
| 5-year                          | 27.1 (26.0-28.2) | 24.2 (22.4-26.0) | 34.8 (31.2-38.4) | 31.7 (27.6-35.9) | 26.3 (25.1-27.5) | 22.4 (20.4-24.3) |
| 10-year                         | 20.7 (19.5-22.0) | 17.7 (16.0-19.6) | 26.7 (23.2-30.4) | 22.5 (18.6-26.6) | 20.1 (18.8-21.4) | 16.6 (14.6-18.7) |
| Median (months)                 | 19.9             | 19.1             | 26.6             | 30.2             | 19.2             | 17.3             |
| <b>Distant</b>                  |                  |                  |                  |                  |                  |                  |
| 1-year                          | 28.7 (27.8-29.5) | 25.4 (23.8-26.9) | 34.2 (31.5-36.8) | 28.2 (25.0-31.4) | 27.9 (27.0-28.9) | 24.4 (22.7-26.2) |
| 2-year                          | 12.6 (12.0-13.3) | 9.6 (8.5-10.7)   | 15.9 (13.9-18.0) | 9.9 (7.9-12.2)   | 12.2 (11.5-12.9) | 9.5 (8.3-10.7)   |
| 5-year                          | 4.6 (4.2-5.1)    | 2.8 (2.2-3.5)    | 4.9 (3.8-6.3)    | 2.8 (1.8-4.3)    | 4.6 (4.1-5.1)    | 2.8 (2.2-3.6)    |
| 10-year                         | 3.5 (3.0-3.9)    | 2.0 (1.5-2.7)    | 3.7 (2.7-5.0)    | 2.5 (1.5-3.9)    | 3.4 (3.0-3.9)    | 1.9 (1.3-2.7)    |
| Median (months)                 | 5.8              | 5.8              | 8.3              | 7.0              | 5.5              | 5.3              |
| <b>Proximal</b>                 |                  |                  |                  |                  |                  |                  |
| <b>Localized</b>                |                  |                  |                  |                  |                  |                  |
| 1-year                          | 73.4 (72.0-74.7) | 67.4 (64.0-70.5) | 85.9 (81.1-89.5) | 84.4 (76.2-89.9) | 72.6 (71.2-74.0) | 64.7 (61.0-68.2) |
| 2-year                          | 60.8 (59.3-62.3) | 54.2 (50.6-57.6) | 77.9 (72.4-82.5) | 72.1 (62.8-79.5) | 59.7 (58.2-61.3) | 51.3 (47.4-55.1) |
| 5-year                          | 47.5 (45.9-49.2) | 40.3 (36.6-43.9) | 66.5 (60.3-71.9) | 58.0 (48.0-66.8) | 46.3 (44.6-48.1) | 37.4 (33.5-41.4) |
| 10-year                         | 39.6 (37.6-41.7) | 34.1 (30.0-38.3) | 60.5 (53.8-66.6) | 54.5 (44.1-63.8) | 38.2 (36.1-40.3) | 30.8 (26.3-35.3) |
| Median (months)                 | 48.3             | 32.0             | -                | -                | 44.7             | 26.0             |
| <b>Regional</b>                 |                  |                  |                  |                  |                  |                  |
| 1-year                          | 66.8 (65.5-68.1) | 62.6 (59.9-65.3) | 77.0 (73.1-80.4) | 77.2 (71.2-82.1) | 65.7 (64.3-67.1) | 59.4 (56.3-62.4) |
| 2-year                          | 45.1 (43.7-46.6) | 39.9 (37.2-42.7) | 53.9 (49.4-58.1) | 54.2 (47.5-60.4) | 44.2 (42.7-45.7) | 36.8 (33.7-39.8) |
| 5-year                          | 26.2 (24.9-27.5) | 20.9 (18.5-23.3) | 33.6 (29.4-37.8) | 27.3 (21.5-33.3) | 25.3 (23.9-26.7) | 19.5 (16.9-22.1) |
| 10-year                         | 19.5 (18.1-21.0) | 15.1 (12.8-17.6) | 24.7 (20.6-29.0) | 18.6 (13.4-24.5) | 19.0 (17.4-20.5) | 14.3 (11.7-17.1) |
| Median (months)                 | 20.5             | 17.0             | 26.7             | 28.5             | 19.9             | 15.9             |
| <b>Distant</b>                  |                  |                  |                  |                  |                  |                  |
| 1-year                          | 29.7 (28.7-30.7) | 24.7 (22.8-26.7) | 35.9 (32.9-38.9) | 27.2 (23.2-31.4) | 28.9 (27.8-29.9) | 24.0 (21.8-26.2) |
| 2-year                          | 13.0 (12.2-13.7) | 8.4 (7.2-9.7)    | 16.8 (32.9-38.9) | 8.3 (5.9-11.2)   | 12.4 (11.7-13.2) | 8.4 (7.0-9.9)    |
| 5-year                          | 4.7 (4.2-5.2)    | 2.4 (1.8-3.3)    | 5.2 (3.9-6.8)    | 2.3 (1.1-4.1)    | 4.6 (4.1-5.1)    | 2.5 (1.7-3.5)    |
| 10-year                         | 3.3 (2.9-3.9)    | 2.1 (1.4-2.9)    | 3.9 (2.7-5.4)    | 2.3 (1.1-4.1)    | 3.3 (2.7-3.9)    | 2.0 (1.3-3.0)    |
| Median (months)                 | 6.3              | 5.8              | 8.9              | 7.0              | 5.9              | 5.5              |
| <b>Distal</b>                   |                  |                  |                  |                  |                  |                  |
| <b>Localized</b>                |                  |                  |                  |                  |                  |                  |
| 1-year                          | 75.6 (73.4-77.5) | 75.6 (72.2-78.5) | 90.1 (81.6-94.8) | 89.1 (82.4-93.3) | 74.9 (72.7-76.9) | 72.8 (69.0-76.2) |
| 2-year                          | 68.5 (66.1-70.7) | 66.7 (63.1-70.1) | 88.0 (78.9-93.3) | 81.7 (74.0-87.3) | 67.6 (65.1-69.9) | 63.6 (59.5-67.4) |
| 5-year                          | 57.3 (54.5-60.0) | 57.1 (53.1-60.9) | 73.3 (62.3-81.6) | 73.5 (64.9-80.3) | 56.6 (53.7-59.3) | 53.6 (49.1-57.9) |
| 10-year                         | 49.7 (46.0-53.2) | 57.1 (46.2-55.8) | 66.1 (53.4-76.1) | 64.5 (54.2-73.0) | 48.8 (45.0-52.4) | 48.3 (42.8-53.7) |
| Median (months)                 | 117              | -                | -                | -                | 111              | 107              |
| <b>Regional</b>                 |                  |                  |                  |                  |                  |                  |
| 1-year                          | 62.0 (59.9-64.0) | 67.4 (64.7-70.0) | 68.9 (62.0-74.9) | 80.0 (74.6-84.3) | 61.3 (59.1-63.4) | 64.0 (60.9-67.0) |
| 2-year                          | 43.4 (41.3-45.5) | 47.5 (44.6-50.3) | 50.9 (43.8-57.6) | 58.8 (52.7-64.5) | 42.7 (40.4-44.9) | 44.4 (41.2-47.6) |
| 5-year                          | 29.2 (27.2-31.3) | 27.5 (24.9-30.2) | 37.8 (31.0-44.6) | 35.5 (29.7-41.3) | 28.4 (26.2-30.6) | 25.4 (22.5-28.4) |
| 10-year                         | 23.3 (21.0-25.7) | 20.3 (17.7-23.0) | 31.5 (24.8-38.5) | 25.7 (20.2-31.6) | 22.5 (20.0-25.0) | 18.8 (15.9-21.9) |
| Median (months)                 | 18.6             | 21.7             | 26.4             | 33.3             | 18.3             | 19.3             |
| <b>Distant</b>                  |                  |                  |                  |                  |                  |                  |
| 1-year                          | 25.3 (23.5-27.0) | 26.4 (23.9-29.0) | 27.6 (22.3-33.2) | 29.5 (34.5-34.7) | 25.0 (23.2-26.9) | 25.2 (22.3-28.2) |
| 2-year                          | 11.6 (10.3-12.9) | 11.6 (9.8-13.6)  | 12.7 (8.9-17.1)  | 12.3 (8.8-16.3)  | 11.5 (10.1-12.9) | 11.3 (9.2-13.6)  |
| 5-year                          | 4.4 (3.6-5.4)    | 3.5 (2.5-4.8)    | 3.8 (1.9-6.8)    | 3.7 (1.9-6.4)    | 4.5 (3.6-5.5)    | 3.4 (2.2-5.0)    |
| 10-year                         | 3.8 (2.9-4.8)    | 1.9 (1.0-3.2)    | 3.2 (1.4-6.2)    | 2.7 (1.1-5.4)    | 3.8 (2.9-4.9)    | 1.7 (0.8-3.2)    |
| Median (months)                 | 4.4              | 5.7              | 6.3              | 7.1              | 4.1              | 5.0              |

CI, confidence interval; Proximal includes cardia, fundus, and body; Distal includes antrum and pylorus

**Table S6.** Derived univariate and multivariable Cox-proportional hazard ratios of mortality for colorectal adenocarcinomas.

| Colorectal Location     | Adenocarcinoma<br>(All Ages) |                  | Adenocarcinoma<br>(Age <50) |                  | Adenocarcinoma<br>(Age ≥50) |                  |
|-------------------------|------------------------------|------------------|-----------------------------|------------------|-----------------------------|------------------|
|                         | Univariate                   | Multivariable    | Univariate                  | Multivariable    | Univariate                  | Multivariable    |
| <b>Transverse Colon</b> | 1.00 (Reference)             | 1.00 (Reference) | 1.00 (Reference)            | 1.00 (Reference) | 1.00 (Reference)            | 1.00 (Reference) |
| <b>Right Colon</b>      | 1.07 (1.05-1.10)             | 1.01 (0.99-1.04) | 1.02 (0.95-1.11)            | 1.03 (0.95-1.12) | 1.08 (1.05-1.10)            | 1.01 (0.99-1.04) |
| Appendix                | 1.31 (1.21-1.42)             | 1.16 (1.07-1.26) | 1.25 (1.05-1.49)            | 1.40 (1.16-1.67) | 1.34 (1.23-1.47)            | 1.12 (1.03-1.23) |
| Cecum                   | 1.18 (1.14-1.20)             | 1.05 (1.02-1.07) | 1.07 (0.98-1.16)            | 1.00 (0.91-1.09) | 1.18 (1.15-1.21)            | 1.05 (1.03-1.08) |
| Ascending Colon         | 0.95 (0.93-0.98)             | 0.96 (0.93-0.99) | 0.93 (0.85-1.02)            | 1.02 (0.93-1.12) | 0.95 (0.93-0.98)            | 0.96 (0.93-0.98) |
| Hepatic Flexure         | 1.07 (1.03-1.10)             | 1.03 (0.99-1.06) | 1.10 (0.97-1.24)            | 1.10 (0.98-1.24) | 1.06 (1.03-1.10)            | 1.02 (0.98-1.06) |
| <b>Left</b>             | 1.02 (1.00-1.05)             | 0.96 (0.94-0.98) | 1.03 (0.95-1.11)            | 0.94 (0.87-1.02) | 1.03 (1.01-1.06)            | 0.97 (0.95-1.00) |
| Splenic Flexure         | 1.10 (1.06-1.15)             | 1.05 (1.01-1.10) | 1.00 (0.89-1.13)            | 1.02 (0.90-1.15) | 1.12 (1.07-1.16)            | 1.05 (1.01-1.10) |
| Descending Colon        | 1.02 (0.99-1.06)             | 0.96 (0.93-0.99) | 0.98 (0.89-1.09)            | 0.91 (0.82-1.01) | 1.03 (0.99-1.06)            | 0.97 (0.93-1.00) |
| Sigmoid Colon           | 1.02 (1.00-1.05)             | 0.94 (0.92-0.97) | 1.05 (0.97-1.13)            | 0.94 (0.87-1.02) | 1.02 (1.00-1.05)            | 0.96 (0.93-0.98) |
| <b>Rectal</b>           | 1.14 (1.12-1.17)             | 1.15 (1.12-1.18) | 1.02 (0.95-1.10)            | 1.06 (0.98-1.15) | 1.17 (1.14-1.20)            | 1.17 (1.14-1.20) |
| Rectosigmoid            | 1.10 (1.07-1.13)             | 1.05 (1.02-1.08) | 1.05 (0.97-1.15)            | 1.00 (0.91-1.10) | 1.11 (1.08-1.14)            | 1.07 (1.04-1.10) |
| Rectum                  | 1.16 (1.14-1.19)             | 1.21 (1.18-1.24) | 1.01 (0.93-1.09)            | 1.10 (1.00-1.21) | 1.20 (1.17-1.23)            | 1.24 (1.20-1.27) |

$p < 0.05$  for all results unless confidence interval crosses 1. Multivariable adjustment corrected for gender, race, detection stage, grade differentiation, surgery, radiotherapy, and chemotherapy. HR, hazard ratios.

**Table S7.** Derived univariate and multivariable Cox-proportional hazard ratios of mortality for colorectal SRCCs.

| Colorectal Location     | Signet Ring Cell<br>(All Ages) |                  | Signet Ring Cell<br>(Age <50) |                  | Signet Ring Cell<br>(Age ≥50) |                  |
|-------------------------|--------------------------------|------------------|-------------------------------|------------------|-------------------------------|------------------|
|                         | Univariate                     | Multivariable    | Univariate                    | Multivariable    | Univariate                    | Multivariable    |
| <b>Transverse Colon</b> | 1.00 (Reference)               | 1.00 (Reference) | 1.00 (Reference)              | 1.00 (Reference) | 1.00 (Reference)              | 1.00 (Reference) |
| <b>Right Colon</b>      | 1.16 (1.01-1.33)               | 0.94 (0.81-1.09) | 1.12 (0.80-1.56)              | 0.91 (0.64-1.30) | 1.16 (0.99-1.36)              | 0.96 (0.82-1.12) |
| Appendix                | 1.25 (1.06-1.48)               | 0.81 (0.67-0.99) | 1.23 (0.86-1.77)              | 0.76 (0.47-1.27) | 1.22 (1.01-1.47)              | 0.84 (0.67-1.06) |
| Cecum                   | 1.33 (1.14-1.54)               | 1.03 (0.89-1.20) | 1.20 (0.84-1.72)              | 0.94 (0.62-1.43) | 1.35 (1.15-1.59)              | 1.07 (0.91-1.27) |
| Ascending Colon         | 0.88 (0.75-1.04)               | 0.88 (0.75-1.04) | 0.90 (0.61-1.34)              | 0.86 (0.56-1.32) | 0.89 (0.74-1.06)              | 0.89 (0.74-1.06) |
| Hepatic Flexure         | 1.20 (0.98-1.47)               | 1.29 (1.04-1.58) | 1.12 (0.71-1.76)              | 1.04 (0.65-1.68) | 1.21 (0.96-1.52)              | 1.31 (1.04-1.65) |
| <b>Left</b>             | 1.39 (1.19-1.62)               | 1.09 (0.93-1.28) | 1.28 (0.91-1.81)              | 0.97 (0.68-1.39) | 1.38 (1.16-1.64)              | 1.10 (0.92-1.33) |
| Splenic Flexure         | 1.00 (0.76-1.31)               | 0.97 (0.73-1.29) | 0.80 (0.47-1.36)              | 0.58 (0.33-1.03) | 1.06 (0.77-1.47)              | 1.07 (0.76-1.49) |
| Descending Colon        | 1.37 (1.10-1.71)               | 1.13 (0.90-1.43) | 1.41 (0.93-2.15)              | 1.11 (0.71-1.72) | 1.30 (0.99-1.70)              | 1.16 (0.87-1.54) |
| Sigmoid Colon           | 1.47 (1.25-1.73)               | 1.09 (0.92-1.30) | 1.37 (0.96-1.97)              | 0.97 (0.66-1.42) | 1.47 (1.22-1.77)              | 1.13 (0.93-1.38) |
| <b>Rectal</b>           | 1.43 (1.23-1.66)               | 1.45 (1.22-1.73) | 1.14 (0.81-1.60)              | 1.10 (0.75-1.62) | 1.52 (1.28-1.80)              | 1.53 (1.26-1.87) |
| Rectosigmoid            | 1.50 (1.24-1.81)               | 1.23 (0.99-1.53) | 1.27 (0.84-1.90)              | 1.03 (0.64-1.65) | 1.56 (1.26-1.94)              | 1.30 (1.01-1.68) |
| Rectum                  | 1.40 (1.20-1.64)               | 1.51 (1.24-1.85) | 1.11 (0.79-1.58)              | 1.16 (0.76-1.77) | 1.50 (1.26-1.79)              | 1.60 (1.28-2.02) |

$p < 0.05$  for all results unless confidence interval crosses 1. Multivariable adjustment corrected for gender, race, detection stage, grade differentiation, surgery, radiotherapy, and chemotherapy. HR, hazard ratios.

**Table S8.** Cause-specific survival of colorectal conventional adenocarcinomas and SRCCs by age group and site.

| Colorectal Location                | All Patients     |                  | Age < 50 years   |                  | Age ≥50 years    |                  |
|------------------------------------|------------------|------------------|------------------|------------------|------------------|------------------|
| Cause-Specific Survival % (95% CI) | Adenocarcinoma   | Signet Ring Cell | Adenocarcinoma   | Signet Ring Cell | Adenocarcinoma   | Signet Ring Cell |
| <b>All Sites</b>                   |                  |                  |                  |                  |                  |                  |
| <b>Localized</b>                   |                  |                  |                  |                  |                  |                  |
| 1-year                             | 95.1 (95.0-95.2) | 91.1 (88.7-93.1) | 99.0 (98.8-99.2) | 91.4 (82.7-95.8) | 94.7 (94.6-94.9) | 91.1 (88.5-93.2) |
| 2-year                             | 92.5 (92.3-92.6) | 86.4 (83.5-88.8) | 97.7 (97.3-98.0) | 87.7 (78.3-93.2) | 92.0 (91.8-92.2) | 86.2 (83.0-88.8) |
| 5-year                             | 85.8 (85.5-86.0) | 77.0 (73.4-80.2) | 92.1 (91.5-92.7) | 73.9 (62.8-82.1) | 85.2 (84.9-85.4) | 77.5 (73.7-80.9) |
| 10-year                            | 79.5 (79.2-79.8) | 70.7 (66.5-74.4) | 86.6 (85.8-87.4) | 70.5 (58.8-79.4) | 78.8 (78.5-79.1) | 70.6 (66.1-74.7) |
| Median (months)                    | -                | -                | -                | -                | -                | -                |
| <b>Regional</b>                    |                  |                  |                  |                  |                  |                  |
| 1-year                             | 91.7 (91.5-91.8) | 79.5 (77.7-81.2) | 97.4 (97.2-97.7) | 87.7 (84.2-90.4) | 90.9 (90.7-91.0) | 77.3 (75.2-79.3) |
| 2-year                             | 85.1 (84.9-85.3) | 61.5 (59.3-63.6) | 92.5 (92.0-92.9) | 66.0 (61.3-70.3) | 84.1 (83.8-84.3) | 60.4 (57.9-62.7) |
| 5-year                             | 70.4 (70.1-70.7) | 43.5 (41.3-45.8) | 79.1 (78.4-79.7) | 44.1 (39.3-48.9) | 69.2 (68.9-69.5) | 43.4 (40.9-45.9) |
| 10-year                            | 60.8 (60.5-61.1) | 36.2 (33.9-38.5) | 69.0 (68.1-69.8) | 36.3 (31.5-41.2) | 59.6 (59.2-59.9) | 36.2 (33.6-38.8) |
| Median (months)                    | -                | 38.2             | -                | 43.6             | -                | 36.9             |
| <b>Distant</b>                     |                  |                  |                  |                  |                  |                  |
| 1-year                             | 57.9 (57.5-58.2) | 46.5 (44.3-48.7) | 74.2 (73.3-75.1) | 56.2 (51.8-60.3) | 55.1 (54.6-55.5) | 43.1 (40.5-45.6) |
| 2-year                             | 37.3 (36.9-37.7) | 22.6 (20.8-24.5) | 50.4 (49.4-51.4) | 27.8 (24.0-31.8) | 35.1 (34.7-35.5) | 20.7 (18.6-22.9) |
| 5-year                             | 14.2 (13.9-14.5) | 5.8 (4.8-7.0)    | 19.7 (18.9-20.5) | 8.6 (6.3-11.5)   | 13.2 (12.9-13.5) | 4.8 (3.7-6.1)    |
| 10-year                            | 8.5 (8.6-9.1)    | 3.1 (2.3-4.2)    | 12.5 (11.8-13.3) | 4.0 (2.3-6.5)    | 8.2 (7.9-8.5)    | 2.8 (1.9-4.0)    |
| Median (months)                    | 16.1             | 11.1             | 24.2             | 14.1             | 14.6             | 9.7              |
| <b>Right Colon</b>                 |                  |                  |                  |                  |                  |                  |
| <b>Localized</b>                   |                  |                  |                  |                  |                  |                  |
| 1-year                             | 95.1 (94.9-95.3) | 93.1 (90.0-95.3) | 99.1 (98.5-99.4) | 94.6 (80.1-98.6) | 94.9 (94.6-95.1) | 92.9 (89.6-95.2) |
| 2-year                             | 92.6 (92.4-92.9) | 90.0 (86.5-92.7) | 97.5 (96.7-98.2) | 94.6 (80.1-98.6) | 92.4 (92.1-92.6) | 89.5 (85.7-92.4) |
| 5-year                             | 87.1 (86.8-87.5) | 83.1 (78.7-86.7) | 93.8 (92.6-94.9) | 89.2 (73.7-95.8) | 86.7 (86.4-87.1) | 82.4 (77.6-86.2) |
| 10-year                            | 82.2 (81.7-82.6) | 75.6 (70.0-80.2) | 90.4 (88.8-91.8) | 85.4 (68.0-93.7) | 81.7 (81.2-82.2) | 74.2 (68.2-79.3) |
| Median (months)                    | -                | -                | -                | -                | -                | -                |
| <b>Regional</b>                    |                  |                  |                  |                  |                  |                  |
| 1-year                             | 91.5 (89.3-89.9) | 78.4 (75.8-80.7) | 96.1 (95.4-96.8) | 87.9 (81.8-92.0) | 89.1 (88.8-89.4) | 76.7 (73.9-79.3) |
| 2-year                             | 84.1 (81.4-82.2) | 62.3 (59.3-65.1) | 89.4 (88.2-90.4) | 69.0 (61.3-75.4) | 81.2 (80.8-81.6) | 61.2 (57.9-64.2) |
| 5-year                             | 70.4 (67.6-68.6) | 46.6 (43.6-49.7) | 77.3 (75.7-78.8) | 48.5 (40.5-56.0) | 67.3 (66.8-67.8) | 46.4 (43.0-49.6) |
| 10-year                            | 63.2 (60.5-61.6) | 38.9 (35.7-42.1) | 71.8 (70.1-73.5) | 37.4 (29.4-45.3) | 60.1 (59.6-60.7) | 39.4 (35.9-42.8) |
| Median (months)                    | -                | 45.6             | -                | 53.0             | -                | 44.8             |
| <b>Distant</b>                     |                  |                  |                  |                  |                  |                  |
| 1-year                             | 49.7 (49.1-50.4) | 49.7 (46.8-52.5) | 65.5 (63.4-67.6) | 60.3 (53.9-66.1) | 48.0 (47.3-48.8) | 46.8 (43.5-50.0) |
| 2-year                             | 28.7 (28.0-29.3) | 24.8 (22.3-27.4) | 37.9 (35.8-40.0) | 31.7 (25.9-37.6) | 27.7 (27.0-28.3) | 22.9 (20.1-25.7) |
| 5-year                             | 11.4 (10.5-11.4) | 6.0 (4.7-7.6)    | 15.1 (13.6-16.8) | 9.1 (6.3-13.9)   | 10.5 (10.1-11.0) | 4.9 (3.5-6.7)    |
| 10-year                            | 7.6 (7.2-8.0)    | 2.6 (1.7-4.0)    | 11.0 (9.6-12.6)  | 3.0 (1.2-6.3)    | 7.2 (6.8-7.7)    | 2.6 (1.5-4.1)    |
| Median (months)                    | 11.9             | 11.9             | 17.9             | 15.6             | 11.2             | 11.1             |
| <b>Transverse Colon</b>            |                  |                  |                  |                  |                  |                  |
| <b>Localized</b>                   |                  |                  |                  |                  |                  |                  |
| 1-year                             | 94.5 (94.0-95.0) | 94.5 (83.9-98.2) | 99.3 (97.9-99.8) | IN               | 94.2 (93.6-94.7) | 94.2 (83.0-98.1) |
| 2-year                             | 92.3 (91.7-93.0) | 90.6 (78.9-96.0) | 99.1 (97.6-99.7) | IN               | 91.9 (91.2-92.5) | 90.1 (77.8-95.8) |
| 5-year                             | 87.2 (86.3-88.0) | 83.8 (70.0-91.6) | 95.3 (92.8-97.0) | IN               | 86.6 (85.7-87.4) | 82.9 (68.5-91.2) |
| 10-year                            | 81.9 (80.8-82.9) | 77.7 (61.8-87.6) | 90.2 (86.4-92.9) | IN               | 81.3 (80.1-82.4) | 76.7 (60.3-87.0) |
| Median (months)                    | -                | -                | -                | IN               | -                | -                |
| <b>Regional</b>                    |                  |                  |                  |                  |                  |                  |
| 1-year                             | 89.2 (88.6-89.9) | 78.2 (71.3-83.6) | 94.6 (92.7-95.9) | 89.7 (71.3-96.5) | 88.7 (88.0-89.4) | 75.9 (68.1-82.1) |
| 2-year                             | 83.1 (82.2-83.9) | 65.1 (57.5-71.7) | 89.6 (87.2-91.5) | 79.3 (59.6-90.1) | 82.4 (81.5-83.2) | 62.3 (53.8-69.7) |
| 5-year                             | 70.6 (69.5-71.6) | 44.7 (37.0-52.2) | 77.6 (74.4-80.4) | 48.3 (29.5-64.8) | 69.8 (68.7-70.9) | 44.2 (35.7-52.4) |
| 10-year                            | 62.8 (61.6-63.9) | 38.1 (30.4-45.9) | 69.7 (66.1-73.0) | 37.1 (20.0-54.3) | 62.0 (68.7-70.9) | 38.6 (29.9-47.2) |
| Median (months)                    | -                | 42.2             | -                | 50.5             | -                | 40.2             |
| <b>Distant</b>                     |                  |                  |                  |                  |                  |                  |
| 1-year                             | 51.2 (49.6-52.8) | 39.9 (29.7-49.9) | 66.6 (62.1-70.6) | 53.3 (26.3-74.4) | 49.1 (47.4-50.7) | 37.3 (26.4-48.2) |
| 2-year                             | 31.7 (30.2-33.2) | 20.8 (12.9-29.9) | 44.6 (40.1-49.1) | 16.7 (2.9-40.2)  | 29.9 (28.4-31.5) | 21.5 (12.9-31.6) |
| 5-year                             | 12.1 (11.0-13.2) | 9.4 (4.0-17.6)   | 22.2 (18.5-26.2) | 8.3 (0.5-30.6)   | 10.6 (9.5-11.8)  | 10.0 (4.0-19.2)  |
| 10-year                            | 8.1 (7.2-9.1)    | 9.4 (4.0-17.6)   | 17.1 (13.6-20.9) | 8.3 (0.5-30.6)   | 6.8 (5.8-7.8)    | 10.0 (4.0-19.2)  |
| Median (months)                    | 12.6             | 9.2              | 20.5             | 12.5             | 11.6             | 8.4              |
| <b>Left Colon</b>                  |                  |                  |                  |                  |                  |                  |
| <b>Localized</b>                   |                  |                  |                  |                  |                  |                  |
| 1-year                             | 95.4 (95.2-95.7) | 91.7 (83.3-95.9) | 99.3 (98.9-99.6) | 93.3 (61.3-99.0) | 95.0 (94.8-95.3) | 91.3 (81.6-96.0) |
| 2-year                             | 93.2 (92.8-93.5) | 89.1 (80.2-94.2) | 98.3 (97.7-98.8) | 86.7 (56.4-96.5) | 92.6 (92.3-92.9) | 89.7 (79.7-95.0) |
| 5-year                             | 86.9 (86.5-87.3) | 78.7 (67.9-86.2) | 93.5 (92.4-94.4) | 66.0 (36.5-84.3) | 86.2 (85.7-86.7) | 81.9 (70.3-89.3) |
| 10-year                            | 80.5 (79.9-81.0) | 76.4 (64.7-84.6) | 87.9 (86.4-89.3) | 66.0 (36.5-84.3) | 79.2 (79.1-80.2) | 79.0 (65.9-87.5) |
| Median (months)                    | -                | -                | -                | -                | -                | -                |
| <b>Regional</b>                    |                  |                  |                  |                  |                  |                  |
| 1-year                             | 93.0 (92.7-93.2) | 82.9 (78.0-86.7) | 98.0 (97.5-98.3) | 85.9 (76.5-91.7) | 92.2 (91.9-92.5) | 81.6 (75.6-86.3) |
| 2-year                             | 87.8 (87.4-88.1) | 65.2 (59.4-70.4) | 94.3 (93.6-95.0) | 64.4 (53.2-73.6) | 86.7 (86.3-87.1) | 65.5 (58.5-71.6) |
| 5-year                             | 73.7 (73.2-74.2) | 44.9 (38.9-50.7) | 81.1 (79.9-82.2) | 43.4 (32.5-53.8) | 72.5 (72.0-73.1) | 45.6 (38.5-52.5) |
| 10-year                            | 63.2 (62.7-63.8) | 38.9 (32.8-44.9) | 70.0 (68.5-71.5) | 40.2 (29.4-50.8) | 62.1 (61.5-62.8) | 38.3 (31.1-45.6) |
| Median (months)                    | -                | 42.1             | -                | 45.0             | -                | 38.7             |
| <b>Distant</b>                     |                  |                  |                  |                  |                  |                  |

|                  |                  |                  |                  |                  |                  |                  |
|------------------|------------------|------------------|------------------|------------------|------------------|------------------|
| 1-year           | 63.7 (63.1-64.3) | 44.0 (39.1-48.8) | 79.0 (77.7-80.3) | 51.0 (42.4-58.9) | 60.6 (59.9-61.3) | 40.4 (34.4-46.2) |
| 2-year           | 44.8 (44.1-45.4) | 22.8 (18.8-27.0) | 57.3 (55.6-58.9) | 27.6 (20.3-35.3) | 42.2 (41.5-42.9) | 20.3 (15.7-25.4) |
| 5-year           | 18.5 (18.0-19.1) | 7.4 (4.9-10.5)   | 23.0 (21.6-24.4) | 10.1 (5.5-16.4)  | 17.6 (17.0-18.2) | 6.1 (3.5-9.7)    |
| 10-year          | 11.3 (10.8-11.8) | 4.4 (2.3-7.5)    | 14.4 (13.1-15.8) | 6.7 (2.7-13.3)   | 10.7 (10.1-11.2) | 3.4 (1.4-6.9)    |
| Median (months)  | 20.3             | 10.4             | 27.7             | 12.3             | 18.5             | 9.3              |
| <b>Rectal</b>    |                  |                  |                  |                  |                  |                  |
| <b>Localized</b> |                  |                  |                  |                  |                  |                  |
| 1-year           | 95.0 (94.7-95.2) | 83.8 (76.2-89.1) | 98.8 (98.4-99.1) | 84.6 (64.0-93.9) | 94.5 (94.2-94.7) | 83.6 (74.9-89.5) |
| 2-year           | 91.7 (91.3-92.0) | 72.5 (63.8-79.4) | 97.1 (96.5-97.6) | 76.9 (55.7-88.9) | 90.9 (90.6-91.3) | 71.4 (61.5-79.2) |
| 5-year           | 82.9 (82.5-83.4) | 55.8 (46.6-64.1) | 89.8 (88.7-90.8) | 53.8 (33.3-70.6) | 82.0 (81.5-82.5) | 56.4 (46.0-65.6) |
| 10-year          | 75.1 (74.5-75.7) | 50.6 (41.2-59.3) | 83.2 (81.8-84.6) | 49.0 (28.5-66.6) | 74.0 (73.3-74.6) | 51.0 (40.3-60.7) |
| Median (months)  | -                | -                | -                | 70.8             | -                | -                |
| <b>Regional</b>  |                  |                  |                  |                  |                  |                  |
| 1-year           | 93.2 (92.9-93.4) | 80.5 (76.6-83.7) | 98.0 (97.6-98.3) | 88.1 (81.7-92.3) | 92.2 (91.9-92.5) | 77.0 (72.1-81.2) |
| 2-year           | 86.6 (86.2-86.9) | 56.2 (51.6-60.5) | 92.9 (92.3-93.6) | 60.9 (52.6-68.3) | 85.3 (84.9-85.7) | 54.0 (48.4-59.3) |
| 5-year           | 69.8 (69.3-70.3) | 35.2 (30.8-39.7) | 78.6 (77.5-79.6) | 39.1 (31.0-47.1) | 68.0 (67.4-68.5) | 33.5 (28.3-38.8) |
| 10-year          | 57.9 (57.3-58.5) | 27.6 (23.3-32.1) | 66.6 (65.2-67.9) | 33.0 (25.1-41.0) | 56.1 (55.4-56.7) | 25.0 (19.9-30.4) |
| Median (months)  | -                | 29.7             | -                | 36.3             | -                | 27.8             |
| <b>Distant</b>   |                  |                  |                  |                  |                  |                  |
| 1-year           | 61.9 (61.2-62.6) | 40.3 (34.9-45.6) | 75.4 (73.9-76.8) | 54.0 (44.6-62.5) | 58.9 (58.1-59.6) | 32.3 (26.0-38.8) |
| 2-year           | 39.8 (39.8-40.6) | 15.3 (11.5-19.5) | 51.5 (49.8-53.2) | 21.5 (14.5-29.4) | 37.2 (36.4-38.0) | 11.6 (7.6-16.6)  |
| 5-year           | 13.3 (12.8-13.8) | 2.7 (1.2-5.2)    | 18.6 (17.2-20.0) | 5.5 (2.1-11.3)   | 12.1 (11.5-12.6) | 1.3 (0.3-4.0)    |
| 10-year          | 7.5 (7.0-8.0)    | 2.7 (1.2-5.2)    | 10.7 (9.5-11.9)  | 5.5 (2.1-11.3)   | 6.8 (6.3-7.3)    | 1.3 (0.3-4.0)    |
| Median (months)  | 18.1             | 9.4              | 24.8             | 13.5             | 16.6             | 7.2              |

CI, confidence interval; IN, insufficient to calculate. Right colon includes appendix, cecum, ascending colon, and hepatic flexure. Left colon includes splenic flexure, descending colon, and sigmoid. Rectal includes rectosigmoid colon and rectum.

**Table S9.** Relative survival of colorectal conventional adenocarcinomas and SRCCs by age group and site.

| Colorectal Location             | All Patients     |                  | Age < 50 years   |                  | Age ≥50 years    |                  |
|---------------------------------|------------------|------------------|------------------|------------------|------------------|------------------|
| Relative Survival %<br>(95% CI) | Adenocarcinoma   | Signet Ring Cell | Adenocarcinoma   | Signet Ring Cell | Adenocarcinoma   | Signet Ring Cell |
| <b>All Sites</b>                |                  |                  |                  |                  |                  |                  |
| <b>Localized</b>                |                  |                  |                  |                  |                  |                  |
| 1-year                          | 94.0 (93.8-94.2) | 87.0 (83.9-89.6) | 98.7 (98.4-99.0) | 89.4 (80.4-94.4) | 93.6 (93.4-93.8) | 86.7 (83.2-89.5) |
| 2-year                          | 92.1 (91.8-92.3) | 82.7 (79.0-85.8) | 97.2 (96.8-97.6) | 86.0 (76.2-91.9) | 91.6 (91.4-91.9) | 82.2 (78.2-85.6) |
| 5-year                          | 86.4 (86.0-86.7) | 74.1 (69.4-78.2) | 91.1 (90.3-91.7) | 71.8 (60.3-80.5) | 86.0 (85.6-86.3) | 74.3 (69.1-78.7) |
| 10-year                         | 79.4 (78.9-79.9) | 68.7 (62.1-74.4) | 85.0 (84.0-85.9) | 67.5 (55.1-77.1) | 78.9 (78.3-79.4) | 68.7 (61.2-75.1) |
| Median (months)                 | -                | -                | -                | -                | -                | -                |
| <b>Regional</b>                 |                  |                  |                  |                  |                  |                  |
| 1-year                          | 90.7 (90.5-90.9) | 77.3 (75.4-79.2) | 97.1 (96.8-97.4) | 86.8 (83.2-89.6) | 89.8 (89.6-90.0) | 74.9 (72.6-77.0) |
| 2-year                          | 84.7 (84.4-84.9) | 60.0 (57.7-62.1) | 91.9 (91.5-92.4) | 64.7 (60.0-69.0) | 83.6 (83.4-83.9) | 58.7 (56.2-61.2) |
| 5-year                          | 70.9 (70.6-71.3) | 42.6 (40.1-44.9) | 78.1 (77.4-78.8) | 41.9 (37.1-46.6) | 69.9 (69.6-70.3) | 42.8 (40.0-45.6) |
| 10-year                         | 61.1 (60.7-61.5) | 34.9 (32.1-37.7) | 67.6 (66.8-68.5) | 33.5 (28.7-38.3) | 60.2 (59.7-60.7) | 35.3 (32.0-38.7) |
| Median (months)                 | -                | 36.6             | -                | 41.1             | -                | 36.1             |
| <b>Distant</b>                  |                  |                  |                  |                  |                  |                  |
| 1-year                          | 56.8 (56.5-57.2) | 45.4 (43.2-47.5) | 73.5 (72.6-74.4) | 56.0 (51.6-60.1) | 54.0 (53.6-54.4) | 41.6 (39.1-44.1) |
| 2-year                          | 36.6 (36.2-37.0) | 21.6 (19.8-23.5) | 49.8 (48.8-50.8) | 27.1 (23.3-30.9) | 34.4 (34.0-34.8) | 19.7 (17.7-21.8) |
| 5-year                          | 13.8 (13.5-14.1) | 5.2 (4.3-6.4)    | 19.1 (18.3-19.9) | 7.8 (5.6-10.4)   | 12.9 (12.6-13.2) | 4.3 (3.3-5.5)    |
| 10-year                         | 8.6 (8.3-8.8)    | 3.0 (2.1-4.1)    | 11.9 (11.1-12.6) | 3.6 (2.0-5.8)    | 8.0 (7.7-8.3)    | 2.8 (1.8-4.1)    |
| Median (months)                 | 15.6             | 10.5             | 23.9             | 14.0             | 14.0             | 9.2              |
| <b>Right Colon</b>              |                  |                  |                  |                  |                  |                  |
| <b>Localized</b>                |                  |                  |                  |                  |                  |                  |
| 1-year                          | 94.1 (93.8-94.4) | 90.6 (86.4-93.5) | 98.8 (98.1-99.3) | 94.7 (79.9-98.7) | 93.9 (93.5-94.2) | 90.1 (85.6-93.3) |
| 2-year                          | 92.8 (92.4-93.2) | 86.8 (82.0-90.4) | 97.3 (96.4-98.0) | 94.7 (79.9-98.7) | 92.6 (92.2-93.0) | 85.9 (80.6-89.9) |
| 5-year                          | 88.9 (88.3-89.5) | 80.1 (73.5-85.3) | 93.1 (91.7-94.3) | 87.5 (70.2-95.1) | 88.7 (88.0-89.3) | 79.1 (71.9-84.7) |
| 10-year                         | 83.4 (82.4-84.4) | 73.4 (63.9-80.8) | 88.4 (86.3-90.1) | 80.9 (60.5-91.4) | 83.1 (82.1-84.2) | 72.4 (61.7-80.6) |
| Median (months)                 | -                | -                | -                | -                | -                | -                |
| <b>Regional</b>                 |                  |                  |                  |                  |                  |                  |
| 1-year                          | 88.7 (88.4-89.1) | 75.8 (73.1-78.3) | 95.7 (94.9-96.4) | 87.7 (81.6-91.9) | 88.2 (87.8-88.5) | 73.8 (70.7-76.6) |
| 2-year                          | 81.8 (81.3-82.2) | 61.1 (58.0-64.0) | 88.6 (87.4-89.7) | 69.3 (61.6-75.7) | 81.2 (80.7-81.7) | 59.7 (56.3-62.9) |
| 5-year                          | 69.8 (69.2-70.3) | 46.0 (42.5-49.3) | 76.1 (74.5-77.7) | 45.4 (37.5-52.9) | 69.2 (68.6-69.9) | 46.2 (42.3-49.9) |
| 10-year                         | 62.6 (61.8-63.4) | 38.5 (34.3-42.7) | 69.8 (67.9-71.6) | 33.3 (25.6-41.1) | 62.0 (61.1-62.9) | 39.9 (35.0-44.7) |
| Median (months)                 | -                | 44.3             | -                | 48.1             | -                | 44.3             |
| <b>Distant</b>                  |                  |                  |                  |                  |                  |                  |
| 1-year                          | 48.6 (47.9-49.3) | 48.4 (45.5-51.2) | 64.7 (62.6-66.8) | 59.9 (53.5-65.6) | 46.9 (46.2-47.6) | 45.2 (42.0-48.5) |
| 2-year                          | 28.0 (27.4-28.6) | 24.0 (21.5-26.5) | 37.3 (35.2-39.4) | 31.0 (25.4-36.8) | 27.0 (26.4-27.6) | 22.0 (19.4-24.8) |
| 5-year                          | 10.7 (10.3-11.2) | 5.6 (4.3-7.1)    | 14.6 (13.1-16.2) | 8.9 (5.8-12.9)   | 10.3 (9.9-10.8)  | 4.6 (3.3-6.3)    |
| 10-year                         | 7.5 (7.0-7.9)    | 2.6 (1.6-4.0)    | 10.3 (8.9-11.9)  | 2.6 (1.0-5.6)    | 7.2 (6.7-7.7)    | 2.7 (1.5-4.4)    |
| Median (months)                 | 11.5             | 11.5             | 17.6             | 15.2             | 10.7             | 10.1             |
| <b>Transverse Colon</b>         |                  |                  |                  |                  |                  |                  |
| <b>Localized</b>                |                  |                  |                  |                  |                  |                  |
| 1-year                          | 93.0 (92.2-93.7) | 90.5 (78.1-96.1) | 99.3 (97.5-99.8) | IN               | 92.5 (91.7-93.3) | 90.0 (76.9-95.8) |
| 2-year                          | 91.8 (90.8-92.6) | 88.0 (71.7-95.2) | 99.1 (97.0-99.7) | IN               | 91.3 (90.2-92.2) | 87.3 (70.2-94.9) |
| 5-year                          | 86.7 (85.3-88.0) | 84.6 (60.1-94.7) | 94.6 (91.5-96.6) | IN               | 86.2 (84.6-87.5) | 83.8 (58.5-94.3) |
| 10-year                         | 79.8 (77.5-81.8) | 64.6 (34.5-83.6) | 89.5 (85.1-92.7) | IN               | 79.1 (76.6-81.3) | 62.8 (32.2-82.6) |
| Median (months)                 | -                | -                | -                | IN               | -                | -                |
| <b>Regional</b>                 |                  |                  |                  |                  |                  |                  |
| 1-year                          | 87.0 (86.1-87.7) | 77.5 (70.2-83.2) | 93.8 (91.8-95.3) | 90.2 (72.1-96.8) | 86.3 (85.4-87.1) | 75.0 (66.6-81.5) |
| 2-year                          | 81.5 (80.5-82.4) | 64.1 (56.0-71.1) | 88.5 (86.0-90.6) | 80.3 (60.9-90.7) | 80.8 (79.7-81.8) | 60.8 (51.7-68.8) |
| 5-year                          | 69.8 (68.5-71.0) | 42.3 (34.0-50.5) | 75.5 (72.3-78.5) | 47.1 (28.6-63.5) | 69.2 (67.8-70.5) | 41.5 (32.1-50.7) |
| 10-year                         | 60.4 (58.7-62.1) | 33.0 (24.8-41.4) | 67.5 (63.7-71.0) | 36.3 (19.5-53.4) | 59.6 (57.7-61.5) | 32.2 (23.0-41.8) |
| Median (months)                 | -                | 38.2             | -                | 50.1             | -                | 35.5             |
| <b>Distant</b>                  |                  |                  |                  |                  |                  |                  |
| 1-year                          | 50.4 (48.8-52.0) | 38.1 (28.3-47.8) | 66.1 (61.7-70.2) | 56.4 (29.6-76.4) | 48.2 (46.5-49.9) | 34.4 (24.1-45.0) |
| 2-year                          | 31.1 (29.6-32.6) | 18.4 (11.2-26.9) | 43.9 (39.4-48.3) | 12.5 (2.1-32.9)  | 29.3 (27.7-30.9) | 19.6 (11.6-29.2) |
| 5-year                          | 11.8 (10.7-13.0) | 6.6 (2.5-13.3)   | 21.3 (17.6-25.1) | 6.3 (0.4-24.8)   | 10.4 (9.4-11.6)  | 6.7 (2.3-14.5)   |
| 10-year                         | 8.0 (6.9-9.1)    | 6.6 (2.5-13.3)   | 15.9 (12.5-19.6) | 6.3 (0.4-24.8)   | 6.8 (5.7-7.9)    | 6.7 (2.3-14.5)   |
| Median (months)                 | 12.2             | 8.9              | 20.0             | 13.0             | 11.1             | 7.2              |
| <b>Left Colon</b>               |                  |                  |                  |                  |                  |                  |
| <b>Localized</b>                |                  |                  |                  |                  |                  |                  |
| 1-year                          | 94.0 (93.6-94.3) | 82.3 (72.1-89.0) | 98.7 (98.2-99.1) | 93.4 (60.8-99.1) | 93.5 (93.1-93.9) | 80.0 (68.4-87.8) |
| 2-year                          | 92.2 (91.8-92.6) | 80.4 (69.6-87.7) | 97.7 (96.9-98.2) | 87.1 (55.9-96.8) | 91.6 (91.2-92.1) | 78.3 (66.2-86.5) |
| 5-year                          | 86.9 (86.2-87.5) | 72.1 (59.6-81.4) | 92.2 (91.0-93.3) | 67.0 (36.6-85.3) | 86.3 (85.6-87.0) | 71.8 (57.4-82.0) |
| 10-year                         | 79.8 (78.8-80.7) | 68.6 (47.7-82.7) | 86.1 (84.3-87.7) | 67.0 (36.6-85.3) | 79.1 (78.1-80.1) | 68.9 (43.1-84.8) |
| Median (months)                 | -                | -                | -                | -                | -                | -                |
| <b>Regional</b>                 |                  |                  |                  |                  |                  |                  |
| 1-year                          | 91.8 (91.5-92.1) | 80.4 (75.2-84.6) | 97.7 (97.2-98.1) | 84.5 (75.1-90.6) | 90.9 (90.5-91.3) | 78.7 (72.2-83.8) |
| 2-year                          | 87.1 (86.7-87.5) | 61.9 (55.9-67.4) | 93.8 (93.0-94.5) | 61.0 (50.0-70.3) | 86.1 (85.6-86.5) | 62.4 (55.0-68.8) |
| 5-year                          | 73.7 (73.2-74.3) | 43.5 (37.4-49.6) | 80.1 (78.8-81.2) | 40.2 (29.8-50.4) | 72.7 (72.1-73.4) | 45.1 (37.4-52.5) |
| 10-year                         | 63.6 (62.8-64.3) | 35.6 (28.8-42.4) | 68.8 (67.3-70.3) | 36.2 (25.8-46.7) | 62.7 (61.9-63.6) | 35.2 (26.6-43.9) |
| Median (months)                 | -                | 37.9             | -                | 39.0             | -                | 36.1             |
| <b>Distant</b>                  |                  |                  |                  |                  |                  |                  |



|                  |                  |                  |                  |                  |                  |                  |
|------------------|------------------|------------------|------------------|------------------|------------------|------------------|
| 1-year           | 62.7 (62.0-63.3) | 43.1 (38.3-47.9) | 78.4 (77.1-79.7) | 50.4 (41.9-58.4) | 59.5 (58.7-60.2) | 39.4 (33.5-45.2) |
| 2-year           | 44.1 (43.4-44.8) | 21.6 (17.7-25.7) | 56.8 (55.1-58.4) | 27.0 (19.8-34.6) | 41.5 (40.8-42.3) | 18.8 (14.4-23.8) |
| 5-year           | 18.1 (17.6-18.7) | 6.1 (3.9-9.0)    | 22.3 (20.9-23.7) | 8.4 (4.3-14.2)   | 17.3 (16.7-17.9) | 5.0 (2.7-8.4)    |
| 10-year          | 10.9 (10.3-11.4) | 3.7 (1.9-6.7)    | 13.7 (12.4-15.1) | 5.6 (2.2-11.5)   | 10.3 (9.7-10.9)  | 2.9 (1.1-6.4)    |
| Median (months)  | 19.8             | 10.0             | 27.5             | 12.1             | 18.0             | 8.8              |
| <b>Rectal</b>    |                  |                  |                  |                  |                  |                  |
| <b>Localized</b> |                  |                  |                  |                  |                  |                  |
| 1-year           | 94.1 (93.8-94.4) | 78.6 (70.2-84.8) | 98.6 (98.0-98.9) | 78.8 (58.5-90.0) | 93.5 (93.2-93.9) | 78.5 (68.8-85.5) |
| 2-year           | 91.2 (90.7-91.6) | 69.6 (60.4-77.0) | 96.6 (95.8-97.2) | 71.8 (51.1-84.9) | 90.5 (90.0-90.9) | 68.9 (58.3-77.4) |
| 5-year           | 83.0 (82.4-83.6) | 52.8 (43.1-61.6) | 88.7 (87.5-89.8) | 50.5 (30.9-67.2) | 82.3 (81.6-82.9) | 53.4 (42.1-63.4) |
| 10-year          | 74.6 (73.7-75.5) | 51.1 (41.0-60.3) | 81.7 (80.1-83.2) | 46.3 (26.7-63.7) | 73.6 (72.6-74.5) | 52.4 (39.5-63.8) |
| Median (months)  | -                | -                | -                | 70.2             | -                | -                |
| <b>Regional</b>  |                  |                  |                  |                  |                  |                  |
| 1-year           | 92.5 (92.2-92.8) | 78.9 (74.9-82.4) | 97.8 (97.3-98.1) | 86.5 (79.9-91.0) | 91.5 (91.1-91.8) | 75.5 (70.4-80.0) |
| 2-year           | 86.1 (85.7-86.5) | 54.8 (50.1-59.2) | 92.6 (91.9-93.2) | 58.9 (50.6-66.3) | 84.8 (84.4-85.3) | 52.9 (47.2-58.3) |
| 5-year           | 69.9 (69.4-70.5) | 34.2 (29.8-38.8) | 77.9 (76.8-79.0) | 38.1 (30.2-46.0) | 68.3 (67.7-68.9) | 32.5 (27.1-37.9) |
| 10-year          | 57.7 (56.9-58.4) | 26.2 (21.6-31.0) | 65.5 (64.1-66.9) | 31.6 (23.8-39.7) | 56.0 (55.2-56.8) | 23.5 (18.0-29.5) |
| Median (months)  | -                | 28.0             | -                | 34.4             | -                | 27.3             |
| <b>Distant</b>   |                  |                  |                  |                  |                  |                  |
| 1-year           | 61.0 (60.3-61.7) | 39.6 (34.3-44.8) | 74.6 (73.1-76.0) | 54.2 (44.9-62.6) | 57.9 (57.1-58.7) | 31.2 (25.1-37.6) |
| 2-year           | 39.1 (38.4-39.8) | 14.3 (10.8-18.4) | 50.8 (49.1-52.5) | 20.9 (14.1-28.7) | 36.4 (35.6-37.2) | 10.6 (6.9-15.2)  |
| 5-year           | 12.8 (12.3-13.3) | 2.6 (1.1-5.0)    | 18.1 (16.8-19.5) | 5.4 (2.1-11.1)   | 11.6 (11.0-12.1) | 1.2 (0.2-3.7)    |
| 10-year          | 7.3 (6.8-7.7)    | 2.6 (1.1-5.0)    | 10.1 (9.0-11.4)  | 5.4 (2.1-11.1)   | 6.6 (6.1-7.1)    | 1.2 (0.2-3.7)    |
| Median (months)  | 17.7             | 9.1              | 24.4             | 13.5             | 16.1             | 6.7              |

CI, confidence interval; IN, insufficient to calculate. Right colon includes appendix, cecum, ascending colon, and hepatic flexure. Left colon includes splenic flexure, descending colon, and sigmoid. Rectal includes rectosigmoid colon and rectum.
